# Supplementary material for: Impact of irreversible sorption of phthalate acid esters on their sediment quality criteria
Source: Royal Society of Chemistry journal article supplement (doi:10.1039/c1em10649j), 2011-12-02
Supplement: c1em10649j.pdf [file c1em10649j.pdf]

## **Impact of Irreversible Sorption of Phthalate Acid Esters on Its Sediment Quality Criteria**

Xinghui Xia<sup>a\*</sup> Ju Zhang<sup>a</sup> Yujuan Sha<sup>a</sup> Jianbing Li<sup>b</sup>

School of Environment, Beijing Normal University /State Key Laboratory of Water  
Environment Simulation, Beijing, 100875, China

Environmental Engineering Program, University of Northern British Columbia,  
Prince George, British Columbia, Canada V2N 4Z9

This supplementary material has six pages, and there are one table and four figures.

---

\* Corresponding author. Tel.: +86 10 58805314; fax: +86 10 58805314.  
E-mail address: [xiakh@bnu.edu.cn](mailto:xiakh@bnu.edu.cn) (X. Xia).

Table S1 Particle size distribution of the sediment samples

| Sediment     | <0.001mm<br>(%) | 0.001-0.005mm<br>(%) | 0.005-0.01mm<br>(%) | 0.01-0.05mm<br>(%) | 0.05-0.25mm<br>(%) | >0.25mm<br>(%) |
|--------------|-----------------|----------------------|---------------------|--------------------|--------------------|----------------|
| Xiao langdi  | 0.105           | 1.497                | 1.326               | 14.716             | 80.191             | 2.168          |
| Hua yuankou  | 1.354           | 3.413                | 0.799               | 20.654             | 72.816             | 0.966          |
| Zhuan kou    | 10.13           | 6.13                 | 15.268              | 34.212             | 34.234             | 0.026          |
| Dong fengzha | 8.592           | 11.55                | 31.336              | 34.872             | 13.65              | 0              |

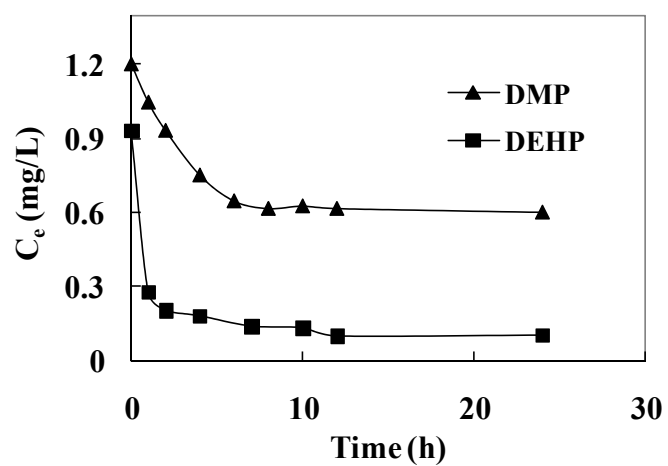

Figure S1 Sorption kinetics of DMP and DEHP on the Hua yuankou sediment

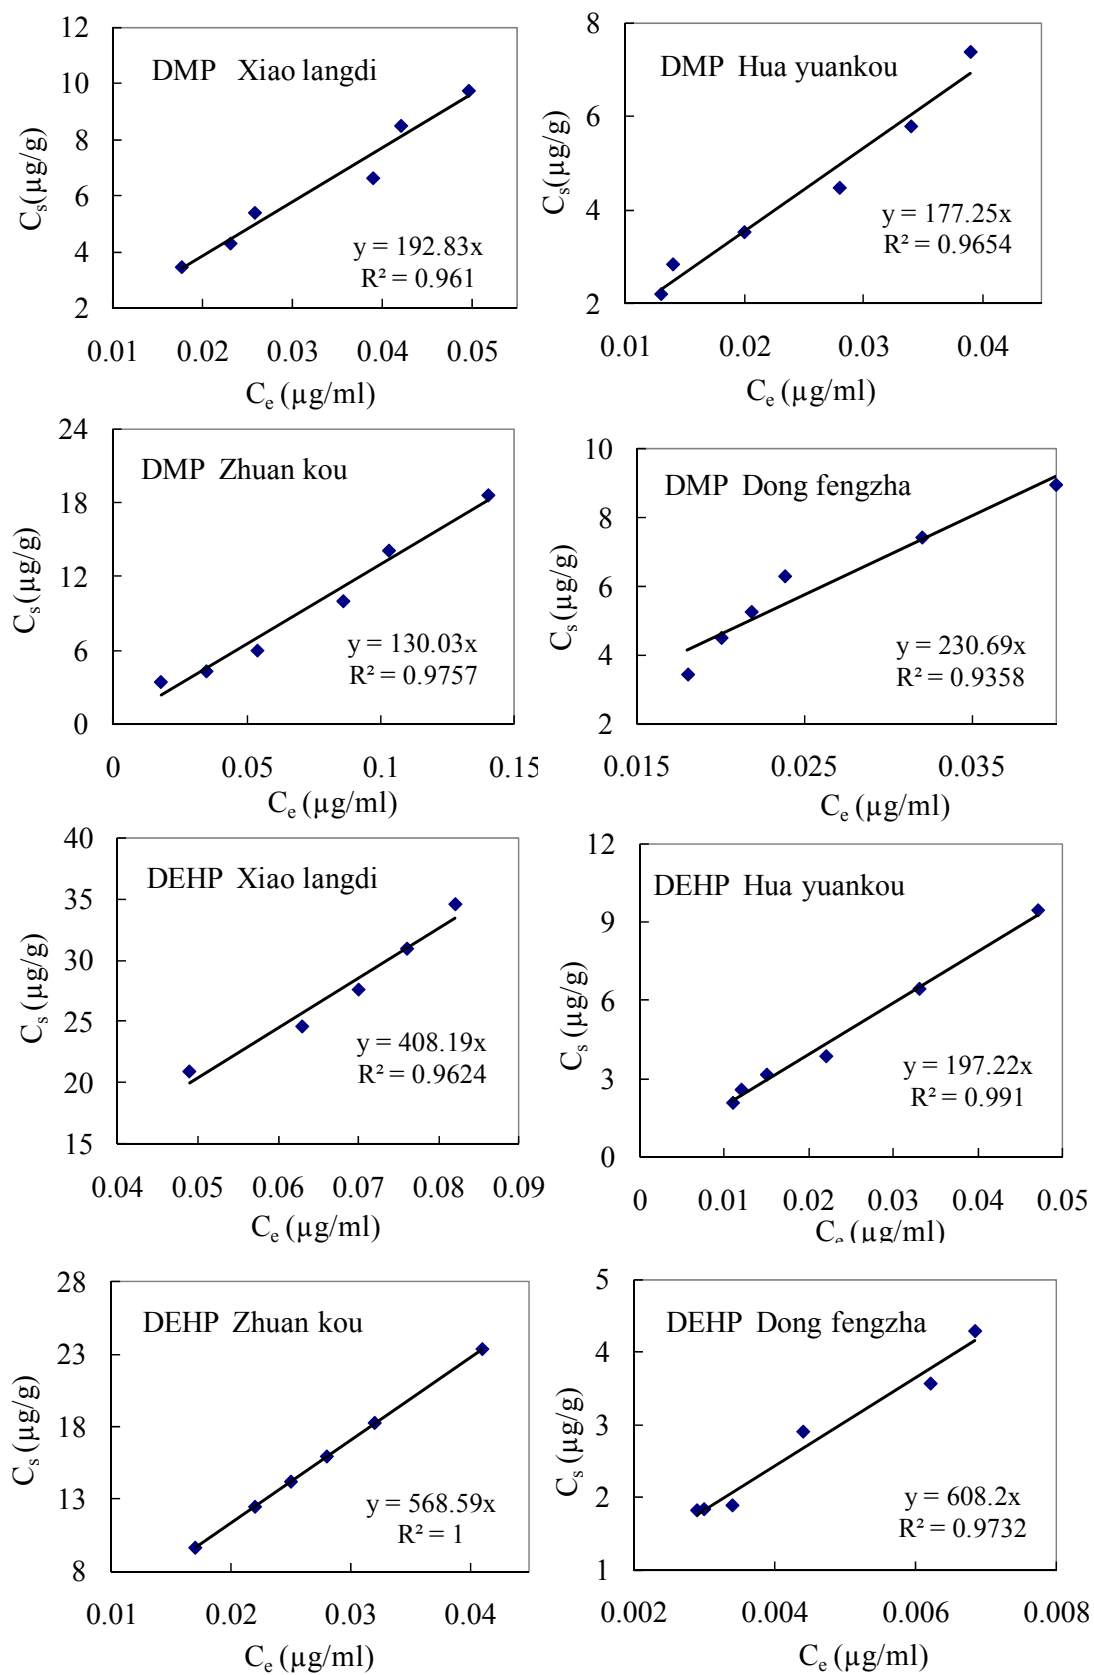

Figure S2 The reversible sorption curves of DMP and DEHP on sediments

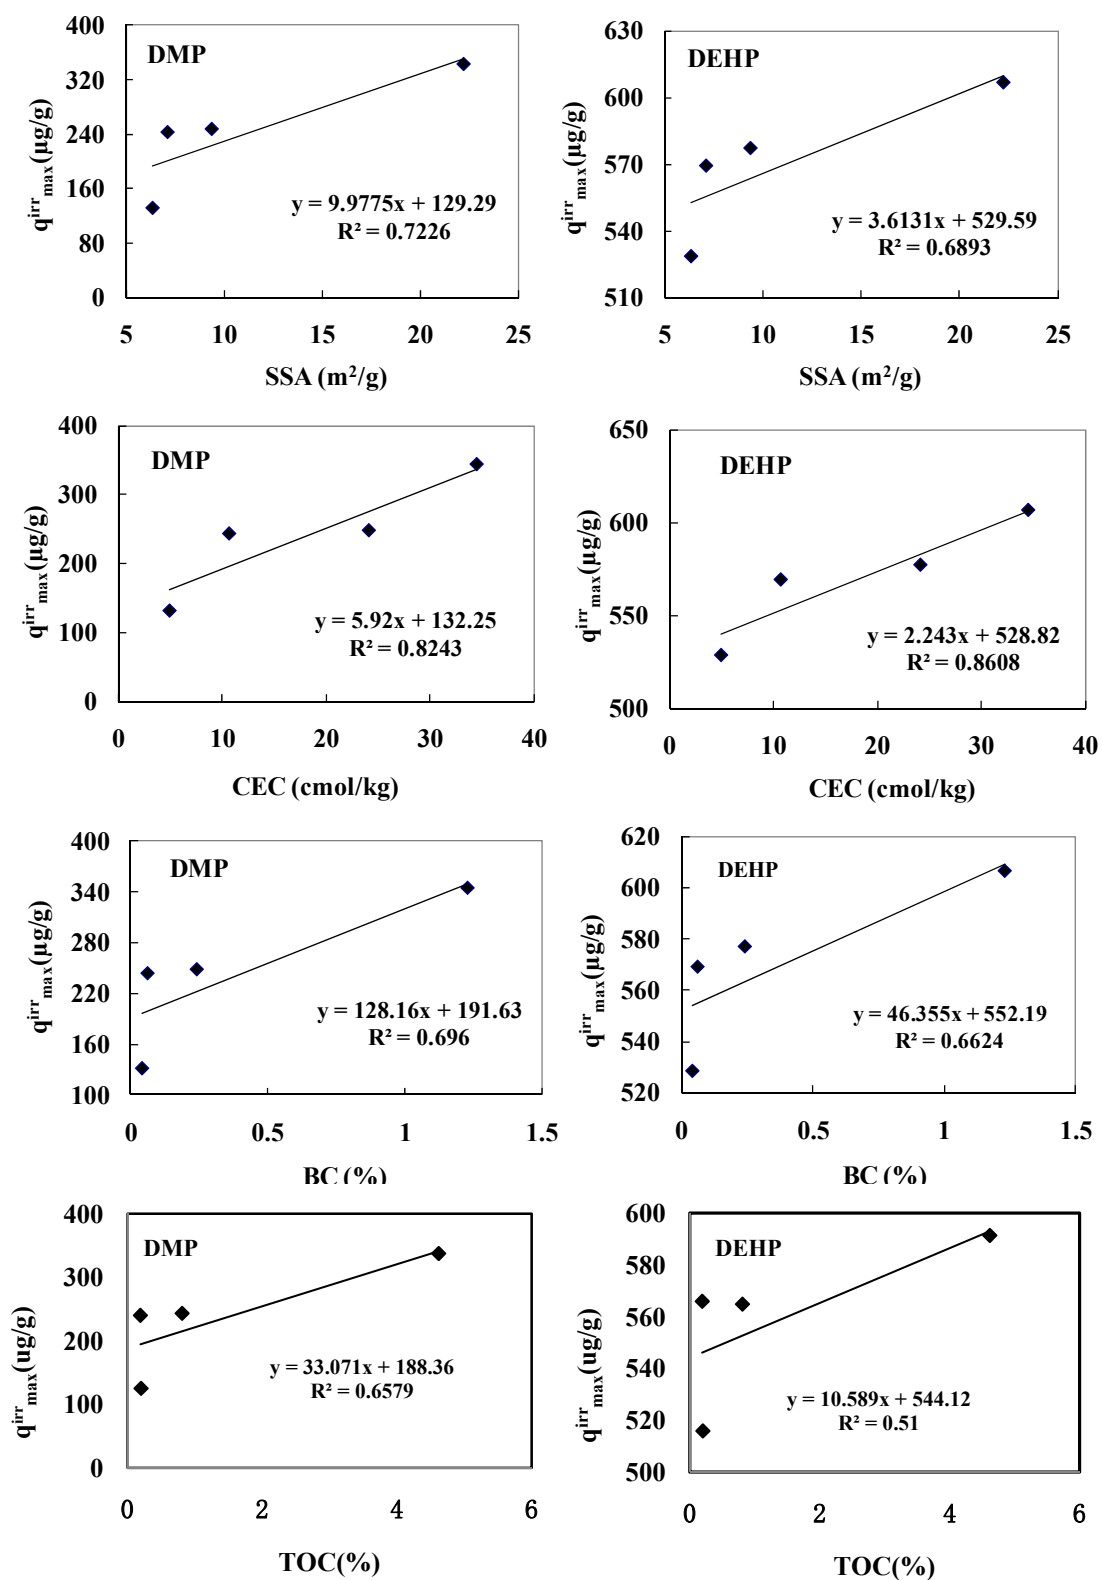

Figure S3 The relationship between the maximum irreversible sorption capacities of PAEs and the properties of sediments

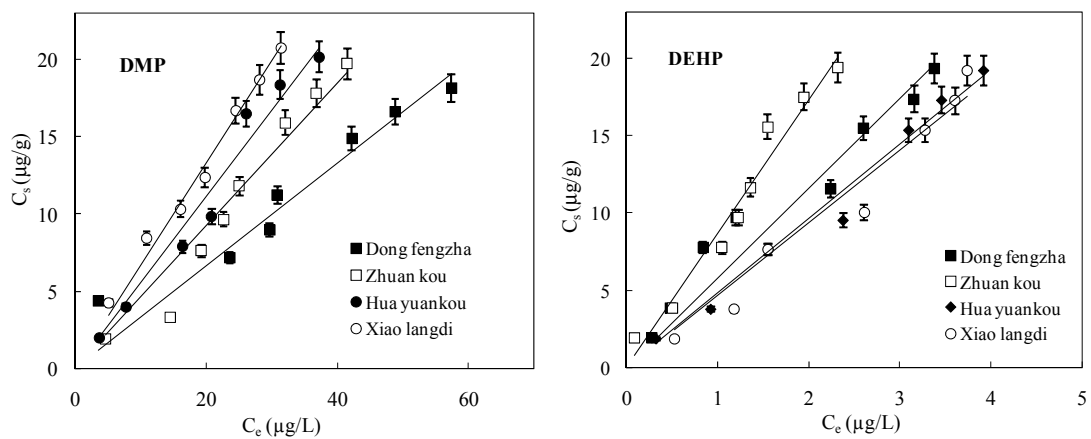

Figure S4 The equilibrium sorption curves of DMP and DEHP on sediments
